# Supplementary material for: Swedish mutant APP-based BACE1 binding site peptide reduces APP β-cleavage and cerebral Aβ levels in Alzheimer’s mice
Source: PubMed Central journal article supplement (PMC4473678; doi:10.1038/srep11322), 2015-06-19
Supplement: srep11322-s1.pdf [file srep11322-s1.pdf]

*Supplementary Information*

**Swedish mutant APP-based BACE1 binding site peptide reduces APP  $\beta$ -cleavage and cerebral A $\beta$  levels in Alzheimer's mice**

Song Li<sup>1,2,\*</sup>, Huayan Hou<sup>1,\*</sup>, Takashi Mori<sup>3</sup>, Darrell Sawmiller<sup>1</sup>, Adam Smith<sup>4</sup>, Jun Tian<sup>1</sup>, Yanjiang Wang<sup>5</sup>, Brian Giunta<sup>6</sup>, Paul R. Sanberg<sup>4</sup>, Sheqing Zhang<sup>1,7</sup> & Jun Tan<sup>1</sup>†

<sup>1</sup>Department of Psychiatry and Behavioral Neurosciences, Morsani College of Medicine, University of South Florida, Tampa, FL 33613, <sup>2</sup>Center for Translational Research of Neurology Diseases, First Affiliated Hospital, Dalian Medical University, Dalian 116011, China, <sup>3</sup>Departments of Biomedical Sciences and Pathology, Saitama Medical Center and Saitama Medical University, Kawagoe, Saitama 350-8550, Japan, <sup>4</sup>Department of Neurosurgery and Brain Repair, Center Of Excellence for Aging & Brain Repair, Morsani College of Medicine, University of South Florida, Tampa, FL 33613, <sup>5</sup>Department of Neurology, Daping Hospital, the Third Military Medical University, Chongqing 400042, China, <sup>6</sup>Neuroimmunology Laboratory, Department of Psychiatry and Behavioral Neurosciences, Morsani College of Medicine, University of South Florida, Tampa, FL 33613, <sup>7</sup>Department of Neurology, Changhai hospital, Shanghai 200433, China.

**Fig. S1.** BACE1, ADAM10 and ADAM17 expression levels in brain homogenates of TAT-APPsweBBP-, TAT- and PBS-treated 5XFAD mice. The expression levels of BACE1, ADAM10 and ADAM17 were not significantly different between TAT-APPsweBBP-, TAT- or PBS-treated mice, as determined by WB analysis.

**Fig. S2. Competitive inhibition of BACE1 endogenous APP cleavage by TAT-APPsweBBP.** BACE1 cleaves APP at the  $\beta$ -cleavage site, with higher efficacy for APPswe (EISEVNLDAEFR) than APPwt (EISEVKMDAEFR), yielding  $\beta$ -CTF and sAPP $\beta$ .  $\beta$ -CTF is then further cleaved at the  $\gamma$ -site to yield A $\beta$ . TAT-APPsweBBP, a BACE1 binding site peptide derived from APPswe (EISEVNLDAEFR) and fused with TAT transduction domain (YGRKKRRQRRR), competitively blocks BACE1 cleavage of APPwt abrogating A $\beta$  production.

**Fig. S3.** Total Akt, phosphorylated Akt and MBP expression levels in brain homogenates did not differ between TAT-APPsweBBP-, TAT- and PBS-treated 5XFAD mice. Akt phosphorylation state and MBP expression levels were examined by WB with specific antibodies against total and phosphorylated Akt (**A**) and MBP protein (**B**).

**Fig. S4. TAT (47-57) peptide conjugation facilitates APPsweBBP penetration across BBB.** Peripherally injected TAT-APPsweBBP freely enters brain microvascular endothelial cells and crosses the BBB from the capillary lumen into the brain parenchyma, while APPsweBBP is stopped at the capillary lumen.

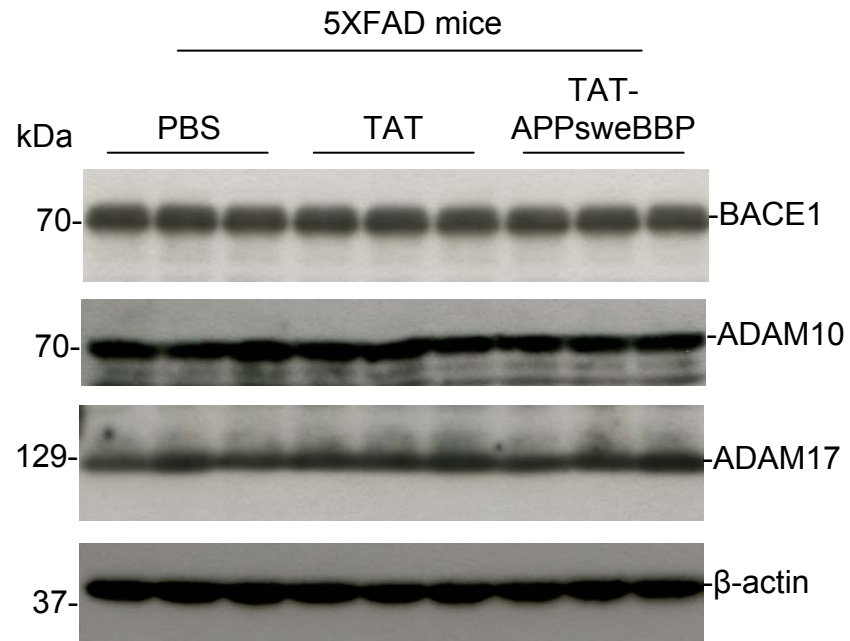

**Fig. S1**

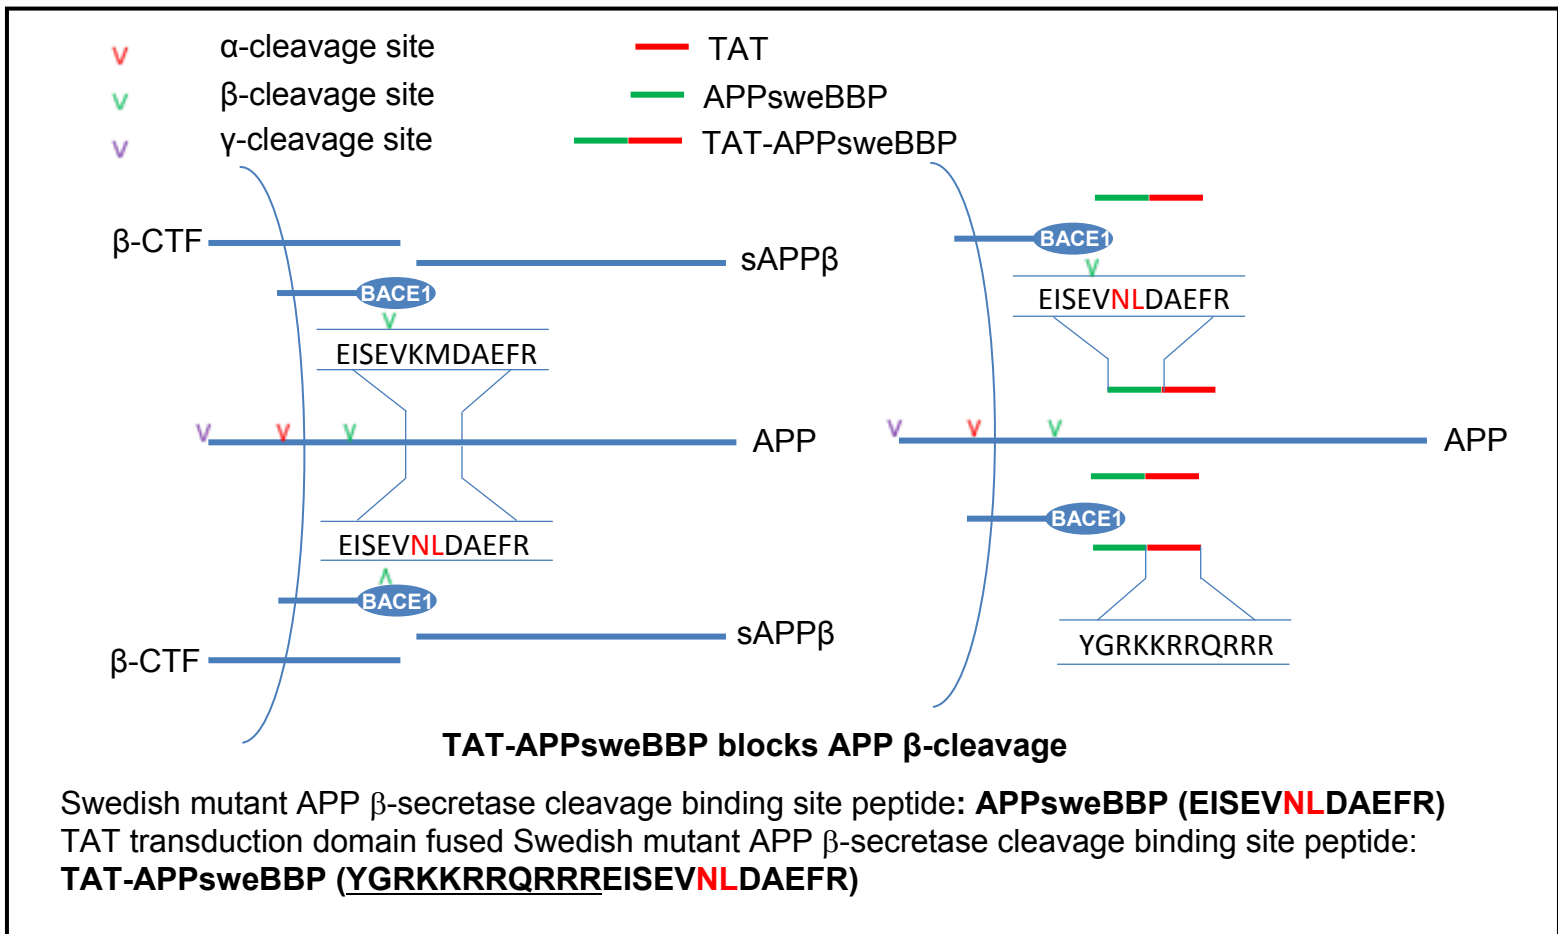

Fig. S2

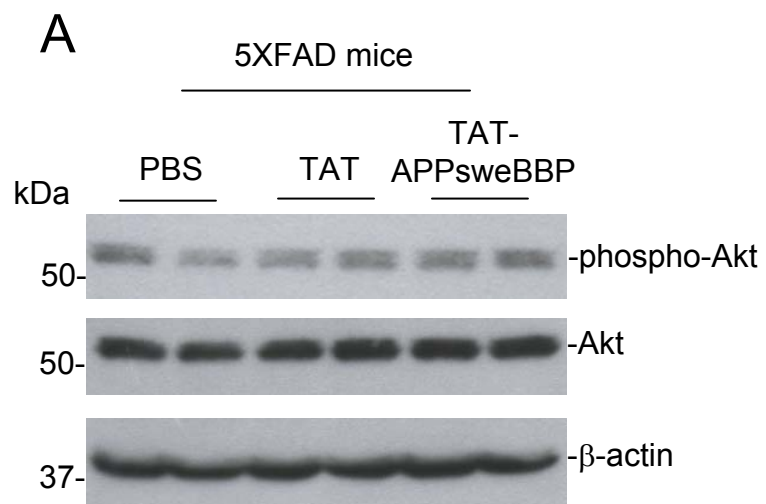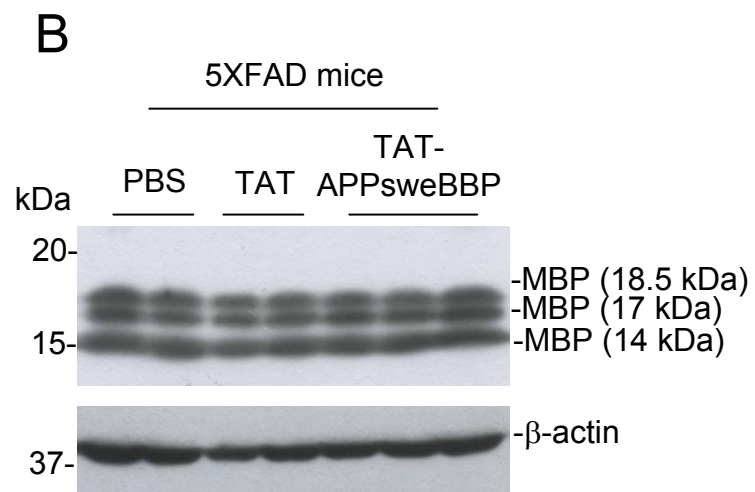

**Fig. S3**

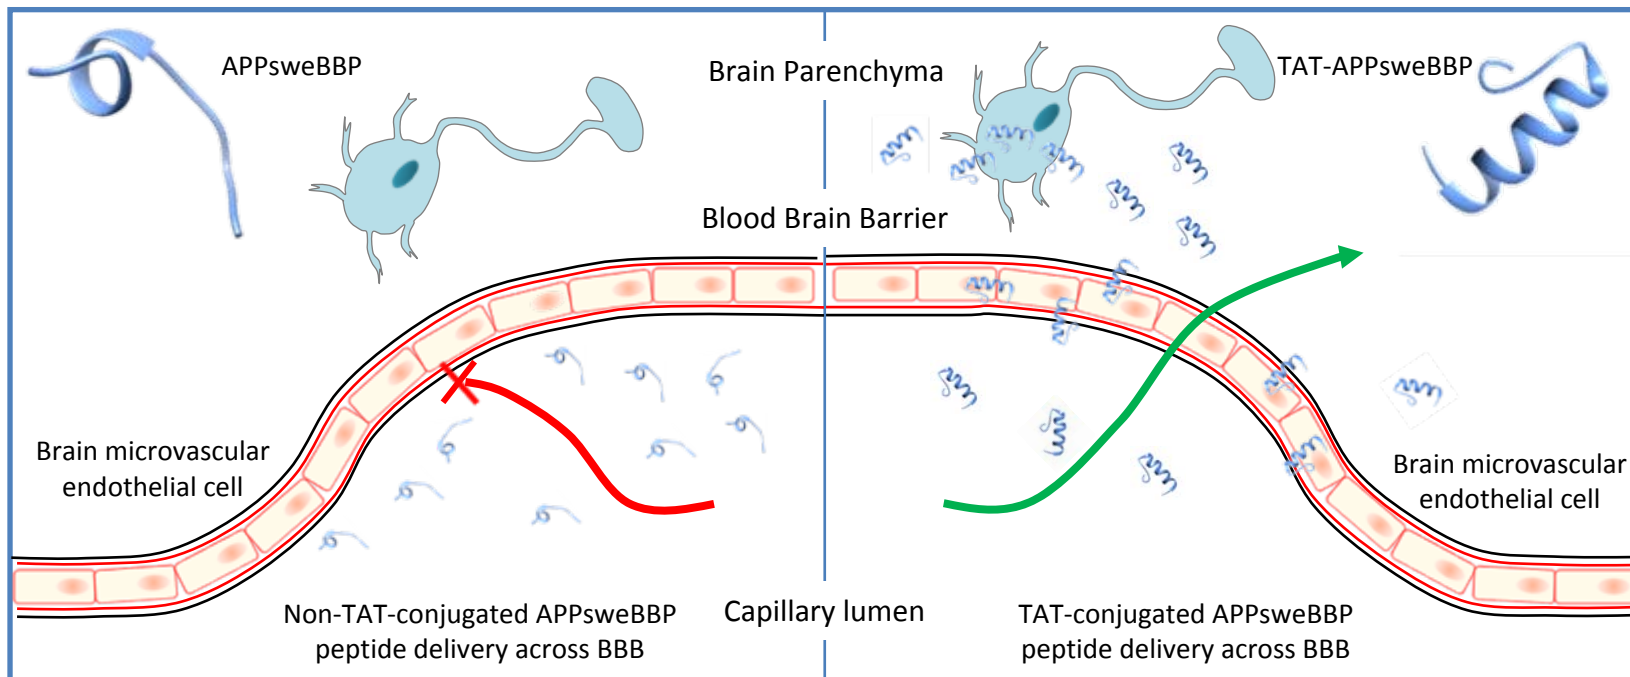

Fig. S4
